# Supplementary material
Source: Springer Nature journal article supplement (https://www.springermedizin.de/resource/supplementary/13024_2013_584_MOESM2_ESM.pdf/9644076)

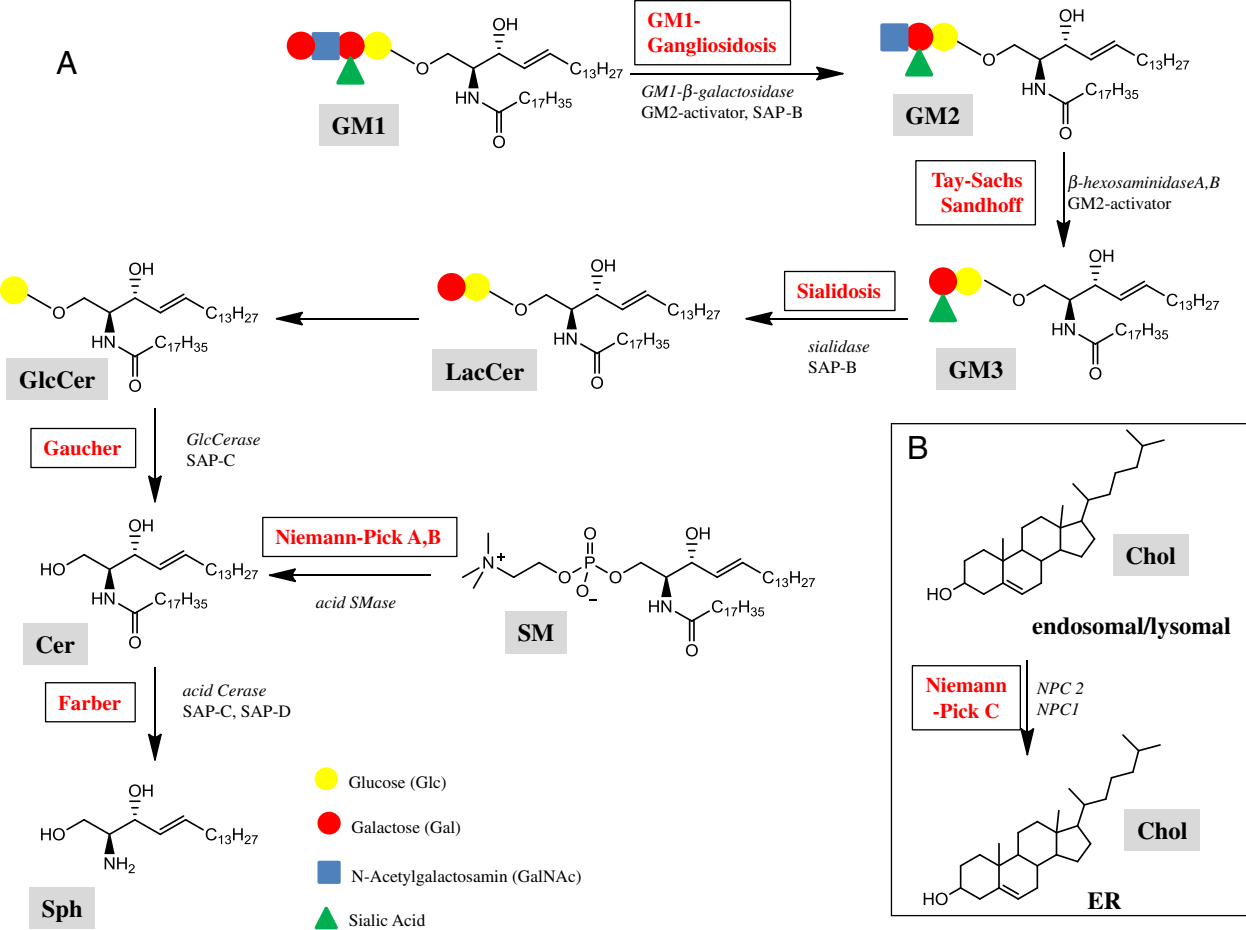

Supplement: MOESM2 [file 9644076]
